# Supplementary material
Source: PubMed Central journal article supplement (PMC5554889)
Supplement: jm7b00671_si_001.pdf [file jm7b00671_si_001.pdf]

## Supplemental Materials

### Development of a potent inhibitor of the *Plasmodium* proteasome with reduced mammalian toxicity

Gregory M. LaMonte<sup>1§</sup>, Jehad Almaliti<sup>3§</sup>, Betsaida Bibo-Verdugo<sup>2§</sup>, Lena Keller<sup>3§</sup>, Bing Yu Zou<sup>1</sup>, Jennifer Yang<sup>1</sup>, Yevgeniya Antonova-Koch<sup>1</sup>, Pamela Orjuela-Sanchez<sup>1</sup>, Colleen A. Boyle<sup>1</sup>, Edgar Vigil<sup>1</sup>, Lawrence Wang<sup>1</sup>, Gregory M. Goldgof<sup>1</sup>, Lena Gerwick<sup>2</sup>, Anthony J. O'Donoghue<sup>2\*</sup>, Elizabeth A. Winzeler<sup>1\*</sup>, William H. Gerwick<sup>2,3\*</sup> and Sabine Otilie<sup>1\*</sup>

<sup>1</sup> Department of Pediatrics, University of California, San Diego, School of Medicine, La Jolla, CA 92093, United States

<sup>2</sup> Skaggs School of Pharmacy and Pharmaceutical Sciences, Faculty of Pharmacy, University of California, San Diego, School of Medicine, La Jolla, CA 92093, USA

<sup>3</sup> Scripps Institution of Oceanography, University of California, San Diego, La Jolla, CA 92093, USA.

§ These authors contributed equally to the project

\* Corresponding authors (AJO for proteasome, EW for malaria, WHG for chemistry, SO for resistance and toxicity)

## Supplemental Materials Table of Contents

### 1) Supplemental Tables

**a) Table S1:** Carmaphycin B resistant strains

**b) Table S2:** Sequencing Statistics for *S. cerevisiae* resistant clones

**c) Table S3:** Results of whole-genome sequencing of the three resistant lines. Mutations in genes encoding ubiquitination or proteasomal proteins are bolded.

**d) Table S4:** Amino acid residues in the  $\beta 5$  binding pocket in the human 20S proteasome (PDB ID 4R67) and equivalent residue substitutions in the *Plasmodium* 20S proteasome (PDB ID 5FMG) that

were identified to be associated with the preferred binding of analog 18 towards the plasmodium 20S proteasome  $\beta$ 5 subunit.

## 2) Supplemental Figures

**a) Figure S1:** Purification of the proteasome from human, both constitutive (A) and immune (B), as well as from *P. falciparum* blood stage parasites (C).

**b) Figure S2:** Multiple sequence alignment of the (A)  $\beta$ 5 and (B)  $\beta$ 6 proteins chains of the human 20S proteasome (PDB ID 4R67 chain L and M), the parasitic 20S proteasome (PDB ID 5FMG chain L and M) and the yeast 20S proteasome (PDB ID 4HRD chain K and L).

**c) Figure S3-S6:**  $^3\text{H}$  and  $^{13}\text{C}$  NMR spectra of analogs **18** and **19**

## 3) Analytical data for validation of carmaphycin B analogs

Includes chemical name, SMILES, yield data and structural validation

## Supplemental Tables

**Table S1:** Carmaphycin B resistant strains

|                                        | GM      | Lineage 1 | Lineage 2 | Lineage 3 |
|----------------------------------------|---------|-----------|-----------|-----------|
| average IC <sub>50</sub><br>( $\mu$ M) | 24.2775 | >150      | 52.7325   | >100      |
| SEM (n=4)                              | 0.30    |           | 2.66      |           |

**Table S2:** Sequencing Statistics for *S. cerevisiae* resistant clones

|                                             | Lineage 1<br>(R7c-2) | Lineage 2<br>(R8b-2) | Lineage 3<br>(R9b-2) |
|---------------------------------------------|----------------------|----------------------|----------------------|
| Total reads                                 | 30,725,372           | 32,374,374           | 25,823,710           |
| Aligned reads                               | 30,176,825           | 31,915,743           | 25,391,150           |
| Percent Aligned Reads                       | 98.2147              | 98.5834              | 98.325               |
| Mean Coverage                               | 210.95               | 221.46               | 179.16               |
| Percent bases covered<br>by 5 or more reads | 99.4                 | 99.4                 | 99.4                 |
| Mean read length                            | 100                  | 100                  | 100                  |
| Median insert size                          | 218                  | 224                  | 231                  |

**Table S3:** Results of whole-genome sequencing of the three resistant lines. Mutations in genes encoding ubiquitination or proteasomal proteins are bolded.

| Lineage   | Chr        | Position      | Codon Change   | Gene Mutated   | Gene Name   | AA Change     | Functional Class |
|-----------|------------|---------------|----------------|----------------|-------------|---------------|------------------|
| Lineage 1 | II         | 473356        | Gcg/Tcg        | YBR115C        | LYS2        | A191S         | Missense         |
|           | III        | 1142221       | Gtc/Ctc        | YDR335W        | MSN5        | V352L         | Missense         |
|           | VII        | 943119        | gGg/gCg        | YGR224W        | AZR1        | G105A         | Missense         |
|           | VII        | 386978        | Cgt/Ggt        | YGL062W        | PYC1        | R595G         | Missense         |
|           | <b>VII</b> | <b>261789</b> | <b>agC/agG</b> | <b>YGL131C</b> | <b>SNT2</b> | <b>S1357R</b> | <b>Missense</b>  |
|           | XV         | 177382        | Att/Gtt        | YOL081W        | IRA2        | I2105V        | Missense         |
|           | XV         | 100169        | Agg/Tgg        | YOL116W        | MSN1        | R121W         | Missense         |
|           | XV         | 656199        | Gaa/Aaa        | YOR172W        | YRM1        | E664K         | Missense         |
|           | VI         | 70366         | caT/caC        | YFL033C        | RIM15       | H1354         | Silent           |
| Lineage 2 | V          | 229448        | Gtg/Atg        | YER039C        |             | V12M          | Missense         |
|           | XV         | 539008        | cTt/cCt        | YOR115C        | TRS33       | L153P         | Missense         |

|                  |             |               |                |                |             |              |                 |
|------------------|-------------|---------------|----------------|----------------|-------------|--------------|-----------------|
|                  | <b>XVI</b>  | <b>732708</b> | <b>atG/atT</b> | <b>YPR103W</b> | <b>PRE2</b> | <b>M120I</b> | <b>Missense</b> |
|                  | XIII        | 380730        | ctC/ctG        | YMR053C        | STB2        | L723         | Silent          |
| <b>Lineage 3</b> | IV          | 310485        |                |                |             |              | Intergenic      |
|                  | IV          | 126219        | Gtc/Ctc        | YDL186W        |             | V202L        | Missense        |
|                  | <b>V</b>    | <b>469834</b> | <b>gCg/gAg</b> | <b>YER151C</b> | <b>UBP3</b> | <b>A864E</b> | <b>Missense</b> |
|                  | V           | 562119        | ttG/ttT        | YER186C        |             | L169F        | Missense        |
|                  | VII         | 742995        | gCc/gTc        | YGR125W        |             | A224V        | Missense        |
|                  | VIII        | 68009         | Gac/Cac        | YHL019C        | APM2        | D514H        | Missense        |
|                  | XI          | 102346        | cCa/cGa        | YKL182W        | FAS1        | P559R        | Missense        |
|                  | XI          | 84734         | Gac/Cac        | YKL189W        | HYM1        | D11H         | Missense        |
|                  | XII         | 447263        | Ccc/Gcc        | YLR153C        | ACS2        | P105A        | Missense        |
|                  | <b>XIII</b> | <b>319043</b> | <b>Agt/Cgt</b> | <b>YMR022W</b> | <b>UBC7</b> | <b>S122R</b> | <b>Missense</b> |
|                  | XIV         | 550739        | Gat/Cat        | YNL041C        | COG6        | D417H        | Missense        |
|                  | XIV         | 326862        | aCa/aGa        | YNL163C        | RIA1        | T1071R       | Missense        |
|                  | XV          | 656188        | aAc/aTc        | YOR172W        | YRM1        | N660I        | Missense        |
|                  | XII         | 627141        | tcG/tcA        | YLR246W        | ERF2        | S8           | Silent          |
|                  | XVI         | 702831        | aaA/aaG        | YPR081C        | GRS2        | K380         | Silent          |

**Table S4:** Amino acid residues in the  $\beta 5$  binding pocket in the human 20S proteasome (PDB ID 4R67) and equivalent residue substitutions in the *Plasmodium* 20S proteasome (PDB ID 5FMG) that were identified to be associated with the preferred binding of analog 18 towards the plasmodium 20S proteasome  $\beta 5$  subunit.

| Protein chain               | Position* | Human 20S Proteasome | <i>P. falciparum</i> 20S Proteasome |
|-----------------------------|-----------|----------------------|-------------------------------------|
| <b><math>\beta 5</math></b> | 22        | Ala                  | Met                                 |
|                             | 96        | Ser                  | Cys                                 |
| <b><math>\beta 6</math></b> | 131       | Gln                  | Cys                                 |
|                             | 133       | Asp                  | Ala                                 |
|                             | 136       | Lys                  | Ser                                 |

## Supplemental Figures

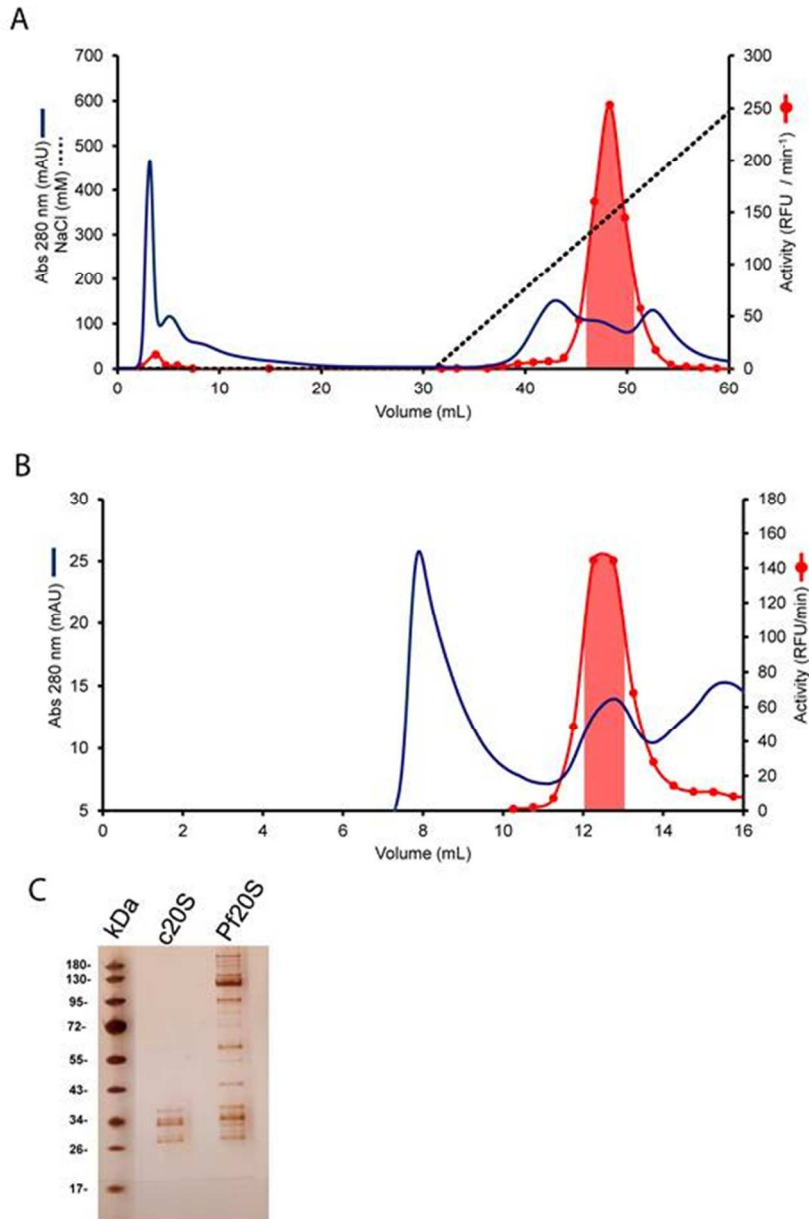

**Figure S1:** Enrichment of the Pf20S proteasome from *P.falciparum* lysate using A) anion exchange and B) size-exclusion chromatography. Following each chromatographic step, fractions were assayed with LLVY-AMC and the most active fractions (red shading) were pooled. C) Silver-stained SDS-PAGE gel to compare of the Pf20S alpha and beta subunits with the commercial preparation of the constitutive 20S proteasome.

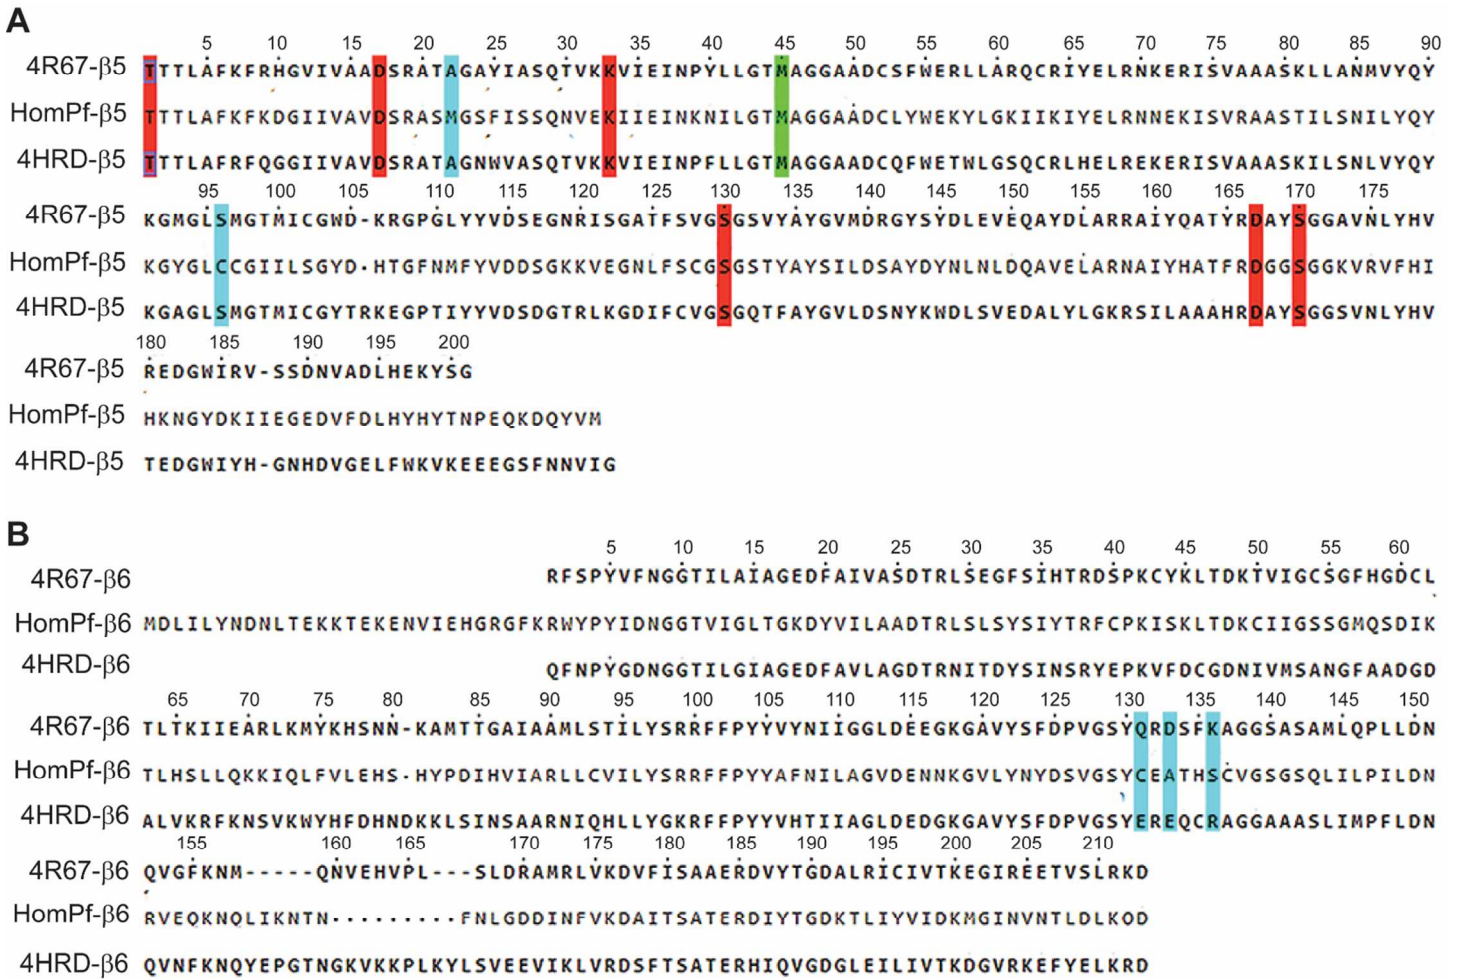

**Figure S2:** Multiple sequence alignment of the (A) β5 and (B) β6 proteins chains of the human 20S proteasome (PDB ID 4R67 chain L and M), the parasitic 20S proteasome (PDB ID 5FMG chain L and M) and the yeast 20S proteasome (PDB ID 4HRD chain K and L). Residue labeling is according to PDB code 4R67. The residues in red are catalytic residues and the residues in blue were identified as residue substitutions in the Pf 20S proteasome model that are associated with the preferred binding of analog **18** towards the *plasmodium* 20S proteasome β5 subunit (Table S4). The methionine residue (green) is replaced by isoleucine in the carmaphycin resistant yeast mutant strain.

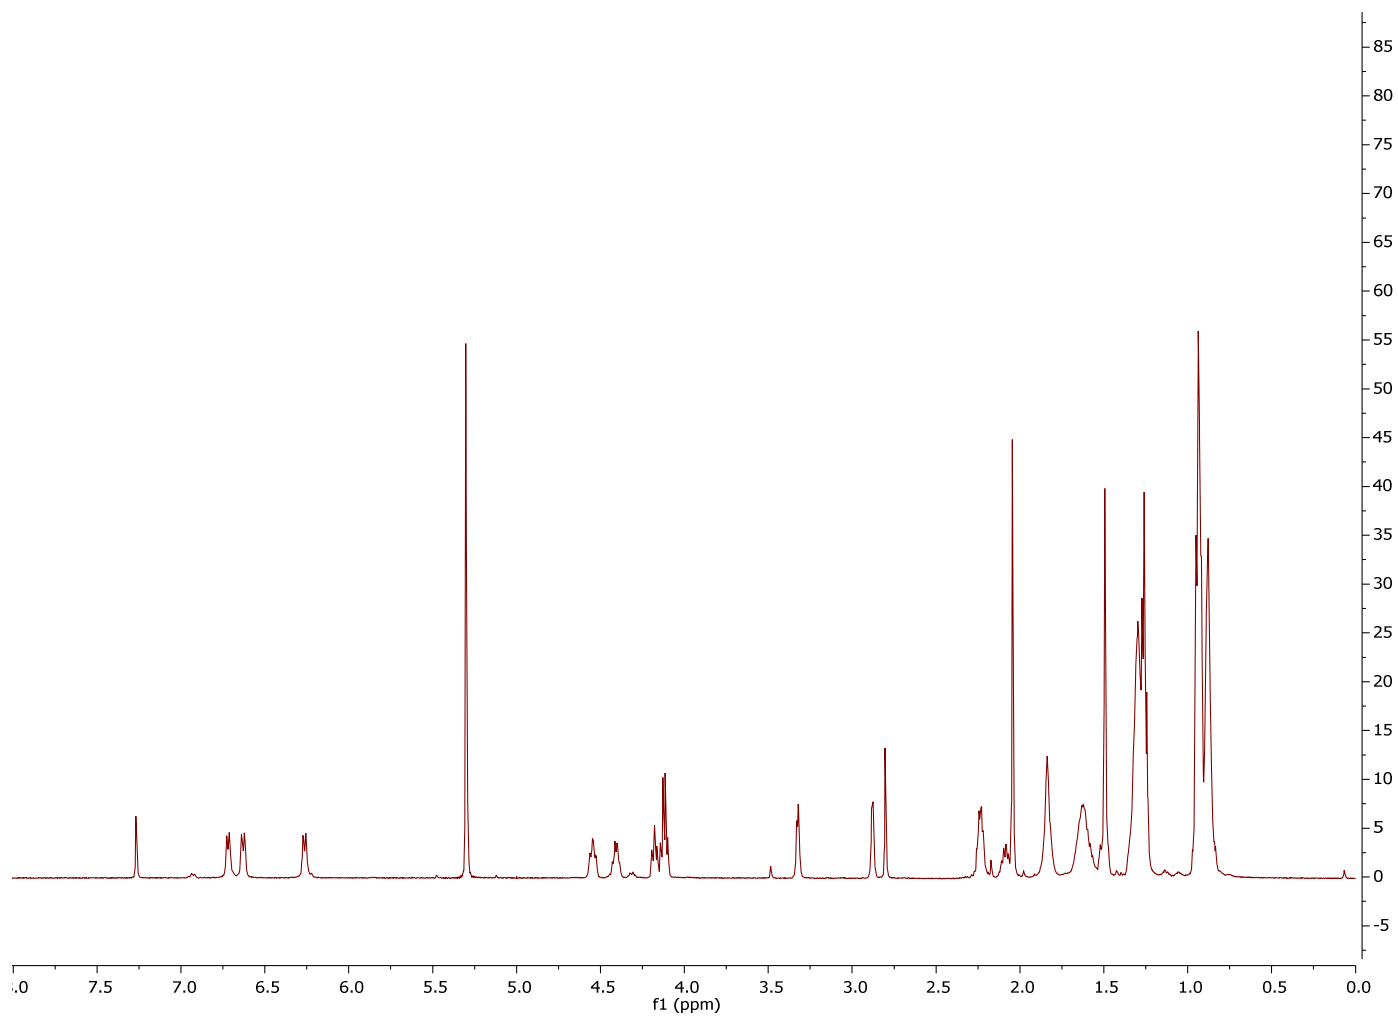

**Figure S3.**  $^1\text{H}$  NMR spectrum of analog 18

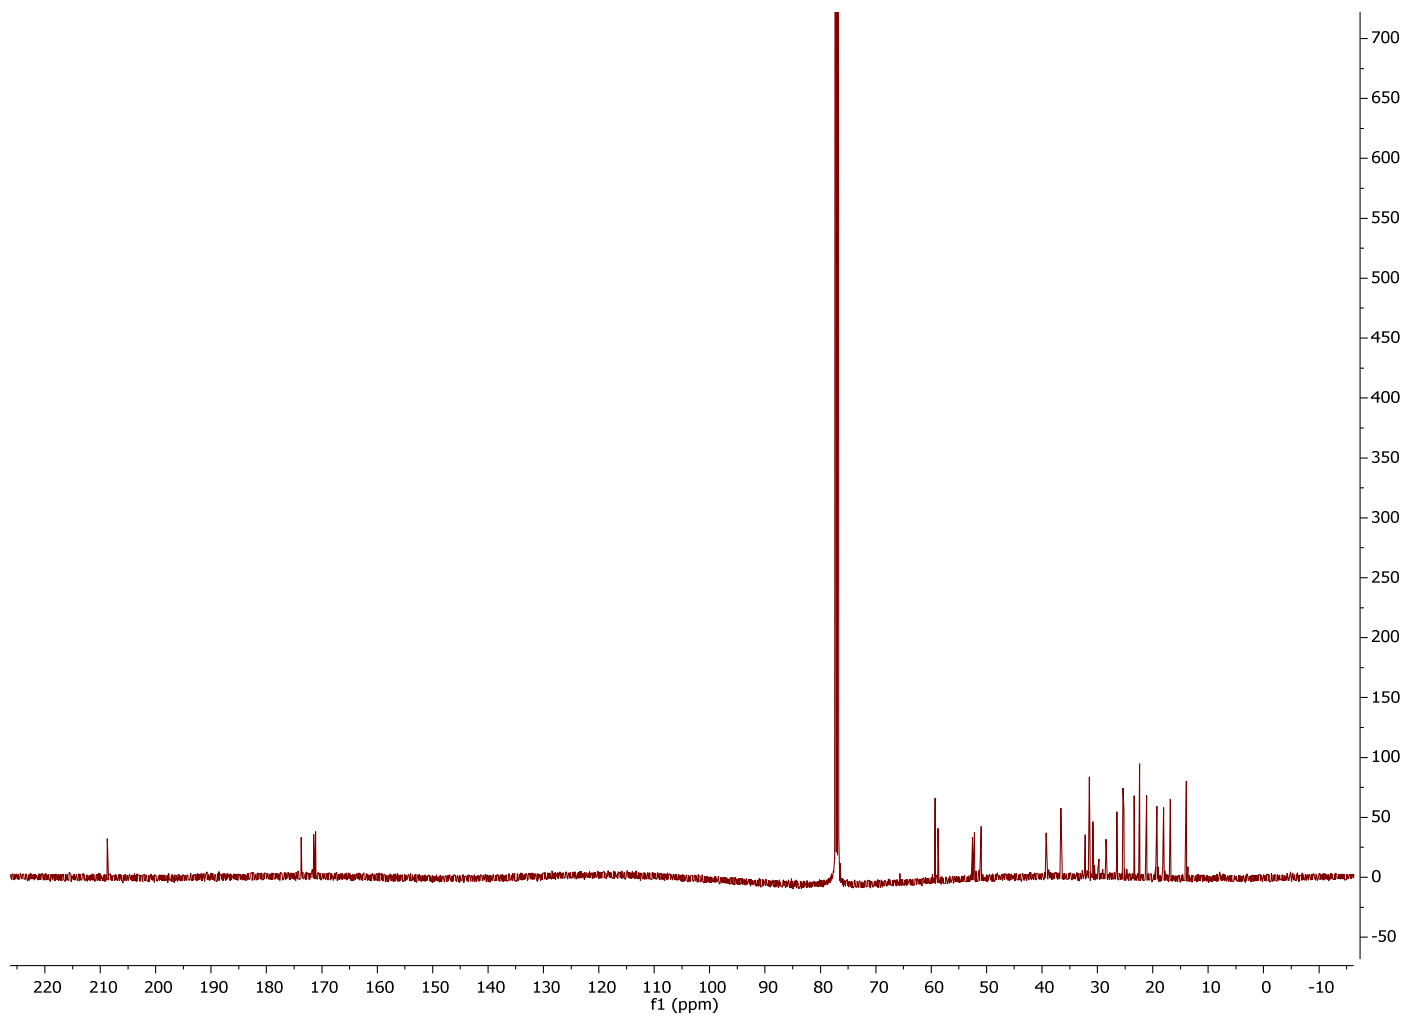

**Figure S4.**  $^{13}\text{C}$  NMR spectrum of analog 18



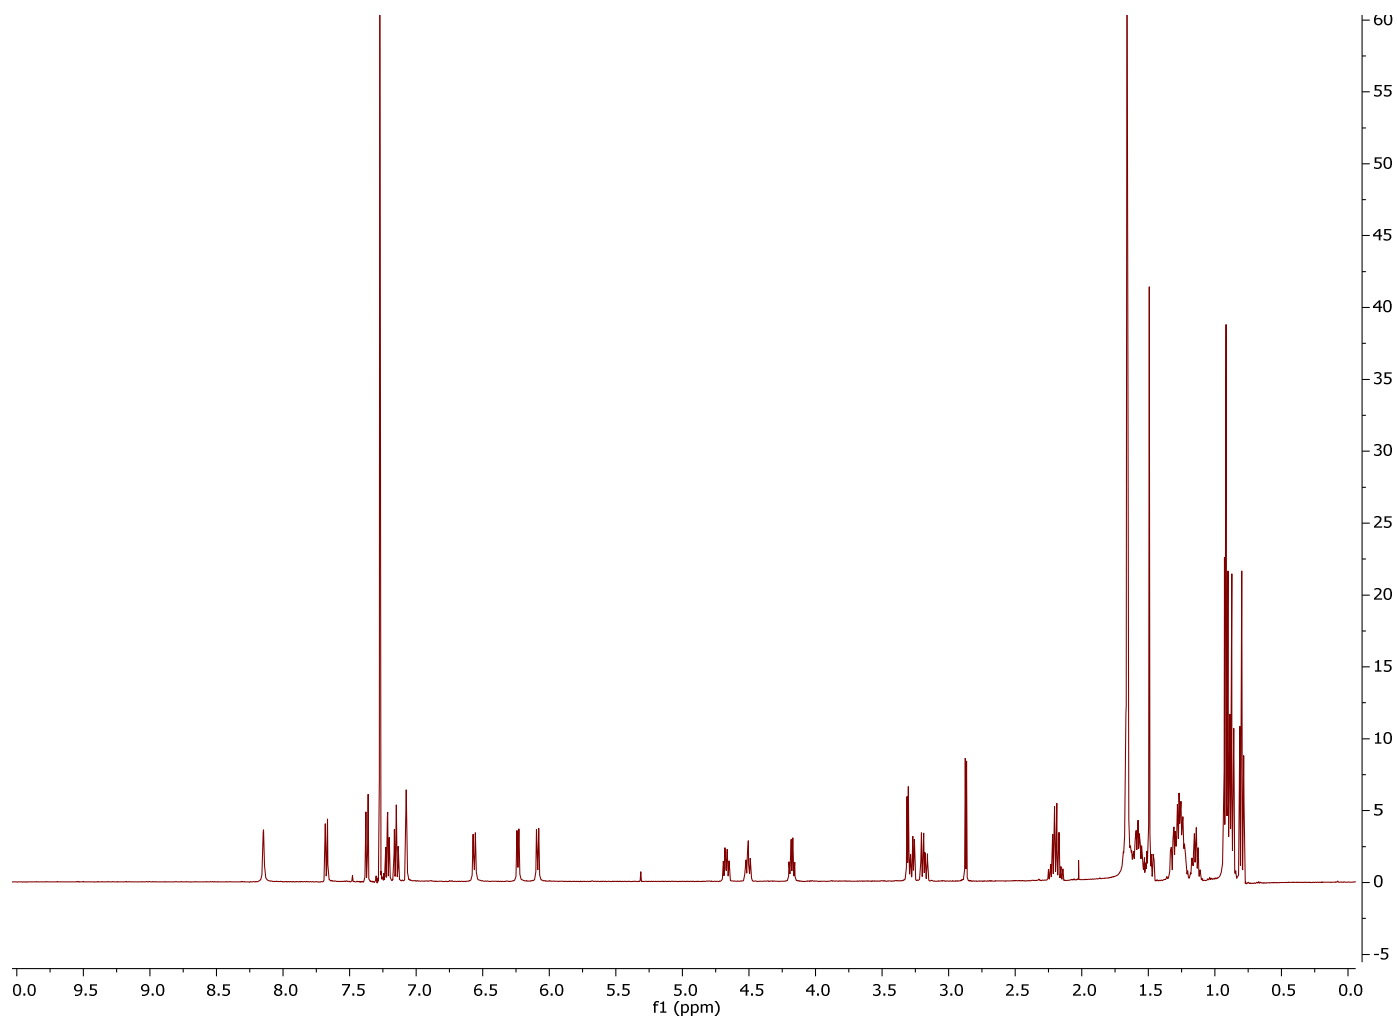

**Figure S5.**  $^1\text{H}$  NMR spectrum of analog **19**

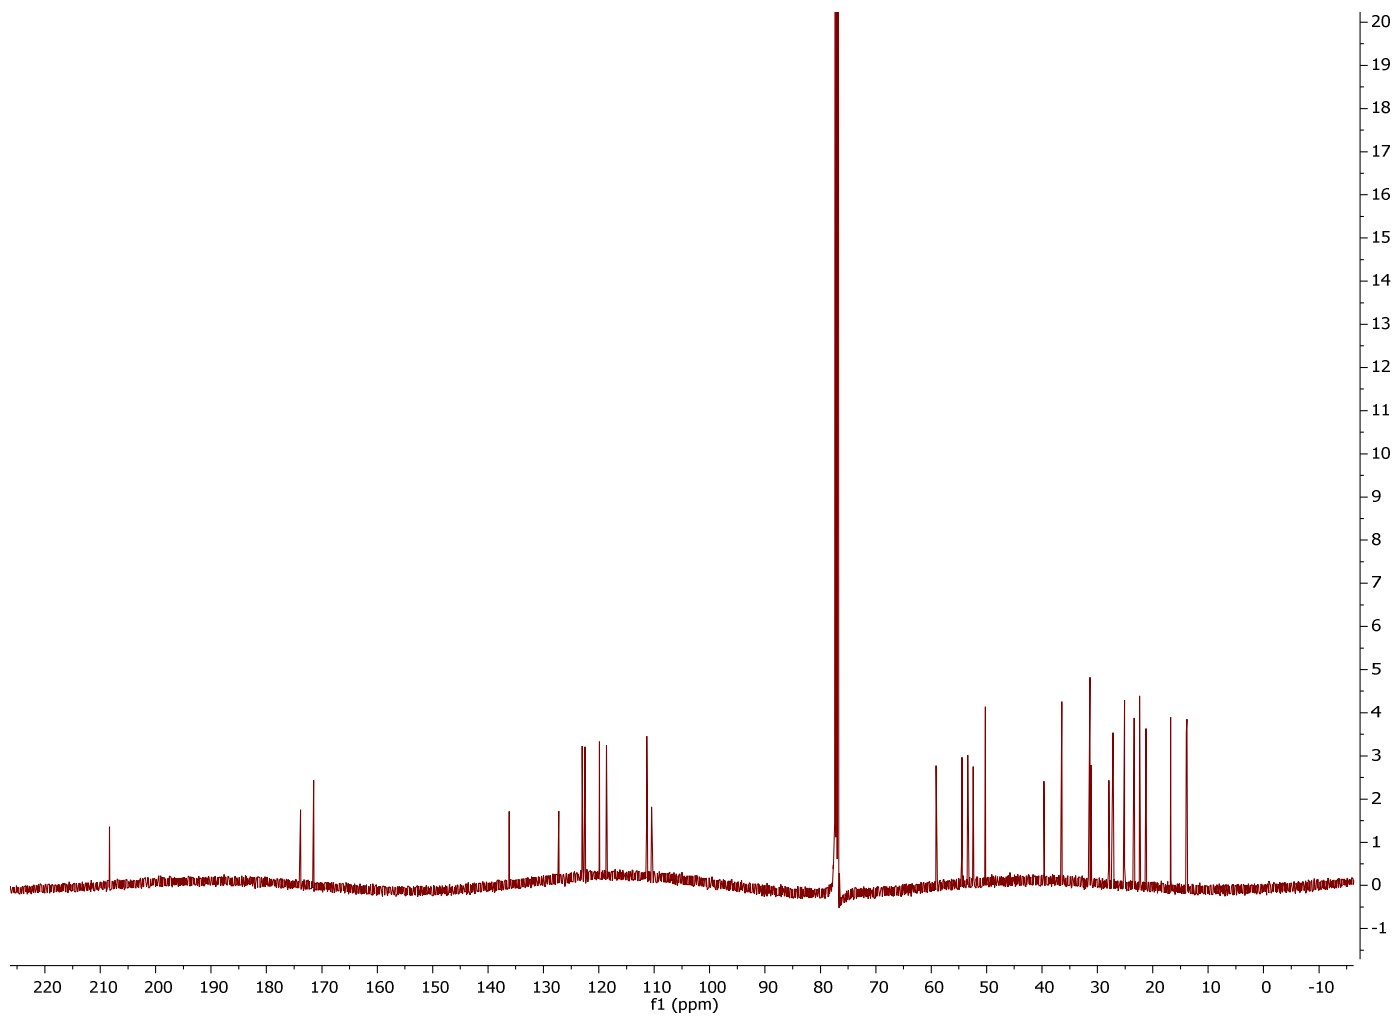

**Figure S6.**  $^{13}\text{C}$  NMR spectrum of analog **19**

## Analytical data for validation of carmaphycin B analogs

Analog 1: (S)-2-((S)-2-hexanamido-3-methylbutanamido)-N-((S)-4-methyl-1-((R)-2-methyloxiran-2-yl)-1-oxopentan-2-yl)hexanamide.

### Smile:

O=C(N[C@@H](C(C)C)C(N[C@@H](CCCC)C(N[C@@H](CC(C)C)C([C@]1(CO1)C)=O)=O)=O)CCCC

Yield 42%;  $[\alpha]_D^{28} +23$  (c 0.8, CHCl<sub>3</sub>); <sup>1</sup>H NMR (500 MHz, CDCl<sub>3</sub>) δ 6.73 (m, 2H), 6.35 (t, *J* = 6.9 Hz, 1H), 4.54 (ddd, *J* = 10.9, 8.0, 3.2 Hz, 1H), 4.40 (q, *J* = 7.5 Hz, 1H), 4.25 (t, *J* = 8.1 Hz, 1H), 3.24 (d, *J* = 5.0 Hz, 1H), 2.84 (d, *J* = 5.0 Hz, 1H), 2.26 – 2.10 (m, 2H), 1.96 (q, *J* = 6.9 Hz, 1H), 1.73 – 1.68 (m, 1H), 1.62 – 1.53 (m, 3H), 1.52 – 1.47 (m, 1H), 1.45 (d, *J* = 3.1 Hz, 3H), 1.29 – 1.13 (m, 10H), 0.87 – 0.76 (m, 18H). <sup>13</sup>C NMR (126 MHz, CDCl<sub>3</sub>) δ 208.6, 173.3, 171.5, 171.3, 59.0, 58.2, 52.9, 52.4, 50.1, 39.9, 36.6, 31.9, 31.4, 31.2, 27.4, 25.4, 25.1, 23.3, 22.3, 21.1, 19.1, 18.3, 16.7, 13.9, 13.8. HRESIMS *m/z* [M+Na]<sup>+</sup> 481.3519 (calcd for C<sub>26</sub>H<sub>47</sub>N<sub>3</sub>O<sub>5</sub>, 481.3516).

Analog 2: (S)-2-((S)-2-hexanamido-3-phenylpropanamido)-N-((S)-4-methyl-1-((R)-2-methyloxiran-2-yl)-1-oxopentan-2-yl)hexanamide.

### Smile:

O=C(N[C@@H](CC1=CC=CC=C1)C(N[C@@H](CCCC)C(N[C@@H](CC(C)C)C([C@]2(CO2)C)=O)=O)=O)CCCC

Yield 52% ;  $[\alpha]_D^{28} -4$  (c 0.6, CHCl<sub>3</sub>); <sup>1</sup>H NMR (500 MHz, CDCl<sub>3</sub>) δ 7.27 – 7.23 (m, 2H), 7.23 – 7.20 (m, 1H), 7.20 – 7.14 (m, 2H), 6.95 (d, *J* = 7.6 Hz, 1H), 6.63 (d, *J* = 7.8 Hz, 1H), 6.53 (d, *J* = 8.0 Hz, 1H), 6.20 (d, *J* = 7.7 Hz, 1H), 4.74 (q, *J* = 6.9 Hz, 0H), 4.58 (ddd, *J* = 10.9, 7.9, 3.1 Hz, 0H), 4.37 (q, *J* = 7.1 Hz, 0H), 3.31 (d, *J* = 5.0 Hz, 1H), 3.06 (q, *J* = 6.7, 6.0 Hz, 1H), 2.89 (dd, *J* = 5.2, 1.6 Hz, 0H), 2.15 (t, *J* = 7.6 Hz, 2H), 1.71-1.78 (m, 2H), 1.66-1.68 (m, 1H), 1.52 (s, 3H), 1.50 – 1.58 (m, 4H), 1.22 – 1.32 (m, 4H), 1.15 – 1.22 (m, 4H), 0.93-0.97 (m, 6H), 0.85 (t, *J* = 7.3 Hz, 3H), 0.84 (t, *J* = 7.4 Hz, 3H). <sup>13</sup>C NMR (125 MHz, CDCl<sub>3</sub>) δ 208.6, 173.6, 171.7, 171.4, 136.3, 129.2, 128.6, 126.9, 59.2, 53.9, 53.2, 52.5, 50.7, 50.4, 39.7, 38.0, 36.4, 31.9, 31.3, 27.4, 25.3,

25.2, 23.4, 22.3, 22.3, 21.2, 16.8, 13.9, 13.9. HRESIMS  $m/z$   $[M+Na]^+$  552.3406 (calcd for  $C_{30}H_{47}N_3O_5Na$ , 552.3413).

Analog **3**: (S)-2-((S)-2-hexanamido-3-(pyridin-4-yl)propanamido)-N-((S)-4-methyl-1-((R)-2-methyloxiran-2-yl)-1-oxopentan-2-yl)hexanamide.

**Smile:**

O=C(N[C@@H](CC1=CC=NC=C1)C(N[C@@H](CCCC)C(N[C@@H](CC(C)C)C([C@]2(CO2)C)=O)=O)=O)C  
CCCC

Yield 62%;  $[\alpha]_D^{28} +6$  (c 0.2,  $CHCl_3$ );  $^1H$  NMR (500 MHz,  $CDCl_3$ )  $\delta$  8.51 (d,  $J = 4.6$  Hz, 2H), 7.13 (d,  $J = 4.6$  Hz, 2H), 6.70 (d,  $J = 7.8$  Hz, 1H), 6.24 (d,  $J = 8.0$  Hz, 1H), 6.06 (d,  $J = 7.9$  Hz, 1H), 4.91 – 4.73 (m, 1H), 4.67 – 4.53 (m, 1H), 4.31 (td,  $J = 7.7, 5.8$  Hz, 1H), 3.29 (d,  $J = 5.0$  Hz, 1H), 3.15 (dd,  $J = 14.1, 6.5$  Hz, 1H), 3.00 (dd,  $J = 14.1, 7.3$  Hz, 1H), 2.92 (d,  $J = 5.1$  Hz, 1H), 2.16 (t,  $J = 7.5$  Hz, 2H), 1.78 (dq,  $J = 13.6, 6.6, 6.1$  Hz, 1H), 1.63 – 1.54 (m, 4H), 1.53 (s, 1H), 1.35 – 1.17 (m, 8H), 0.97 (t,  $J = 6.3, 3H$ ), 0.96 (t,  $J = 6.6, 3H$ ), 0.88 (m, 6H).  $^{13}C$  NMR (126 MHz,  $CDCl_3$ )  $\delta$  208.4, 173.4, 171.1, 170.2, 149.9, 145.4, 124.5, 59.1, 53.3, 52.9, 52.4, 50.4, 39.9, 37.0, 36.4, 32.1, 31.2, 27.4, 25.2, 25.2, 23.3, 22.3, 22.3, 21.2, 16.7, 13.9, 13.8. HRESIMS  $m/z$   $[M+Na]^+$  553.3367 (calcd for  $C_{29}H_{46}N_4O_5Na$ , 553.3366).

Analog **4**: (S)-2-((S)-3-(4-aminophenyl)-2-hexanamidopropanamido)-N-((S)-4-methyl-1-((R)-2-methyloxiran-2-yl)-1-oxopentan-2-yl)hexanamide.

**Smile:**

O=C(N[C@@H](CC1=CC=C(N)C=C1)C(N[C@@H](CCCC)C(N[C@@H](CC(C)C)C([C@]2(CO2)C)=O)=O)=O  
)CCCC

Yield 50%;  $[\alpha]_D^{28} +19$  (c 1.0,  $CHCl_3$ );  $^1H$  NMR (500 MHz,  $CDCl_3$ )  $\delta$  6.90 (d,  $J = 7.8$  Hz, 2H), 6.53 (d,  $J = 7.9$  Hz, 2H), 6.36 (d,  $J = 7.8$  Hz, 1H), 6.32 (d,  $J = 7.9$  Hz, 1H), 5.93 (d,  $J = 7.3$  Hz, 1H), 4.59 – 4.41 (m, 2H), 4.25 (td,  $J = 7.7, 5.7$  Hz, 1H), 3.25 (d,  $J = 5.0$  Hz, 1H), 2.89 (h,  $J = 7.0$  Hz, 2H), 2.83 (d,  $J = 5.0$  Hz, 1H), 2.08 (t,  $J = 7.6$  Hz, 2H), 1.76 – 1.65 (m, 1H), 1.58 (ddt,  $J = 13.4, 6.7, 4.1$  Hz, 1H), 1.50-1.45 (m, 2H), 1.47 (s, 3H), 1.28 – 1.08 (m, 11H), 0.89 (m, 6H), 0.80 (m, 6H).  $^{13}C$  NMR (126 MHz,  $CDCl_3$ )  $\delta$  208.3, 173.4, 171.3, 171.1, 145.3, 130.0,



(126 MHz, CDCl<sub>3</sub>) δ 208.6, 173.5, 171.5, 171.4, 136.2, 127.4, 123.2, 122.4, 119.9, 118.7, 111.3, 110.4, 59.1, 53.7, 53.4, 52.5, 50.2, 40.4, 39.8, 36.6, 31.7, 31.4, 27.9, 27.3, 25.2, 23.4, 23.4, 22.4, 22.3, 21.3, 16.8, 13.9, 13.9. HRESIMS *m/z* [M+Na]<sup>+</sup> 591.3518 (calcd for C<sub>32</sub>H<sub>48</sub>N<sub>4</sub>O<sub>5</sub>Na, 591.3522).

Analog **7**: (S)-2-((S)-2-hexanamido-3-phenylpropanamido)-N-((S)-1-((R)-2-methyloxiran-2-yl)-1-oxo-3-phenylpropan-2-yl)hexanamide.

**Smile:**

O=C(N[C@@H](CC1=CC=CC=C1)C(N[C@@H](CCCC)C(N[C@@H](CC2=CC=CC=C2)C([C@]3(CO3)C)=O)=O)CCCC

Yield 28%; [α]<sub>D</sub><sup>28</sup> -68 (c 0.5, CHCl<sub>3</sub>); <sup>1</sup>H NMR (500 MHz, CDCl<sub>3</sub>) δ 7.29 (dd, *J* = 14.8, 7.4 Hz, 2H), 7.26 – 7.20 (m, 2H), 7.19 – 7.15 (m, 2H), 7.14 – 7.10 (m, 2H), 6.67 (d, *J* = 6.8 Hz, 1H), 6.53 (t, *J* = 6.3 Hz, 1H), 6.20 (d, *J* = 6.4 Hz, 1H), 4.80 (td, *J* = 7.8, 4.9 Hz, 1H), 4.67 (q, *J* = 7.2 Hz, 1H), 4.30 (q, *J* = 7.1 Hz, 1H), 3.33 (d, *J* = 4.9 Hz, 1H), 3.12 (dd, *J* = 13.9, 5.0 Hz, 1H), 2.99 (tt, *J* = 13.9, 7.3 Hz, 2H), 2.91 (d, *J* = 4.9 Hz, 1H), 2.79 (dd, *J* = 13.9, 8.2 Hz, 1H), 2.15 (t, *J* = 7.6 Hz, 2H), 1.81 (m, 2H), 1.67 (ddt, *J* = 16.1, 9.3, 4.3 Hz, 1H), 1.55 (td, *J* = 7.5, 5.1 Hz, 1H), 1.49 (s, 3H), 1.1-1.3 (m, 8H), 0.85 (t, *J* = 7.3 Hz, 3H), 0.84 (t, *J* = 7.4 Hz, 3H). <sup>13</sup>C NMR (125 MHz, CDCl<sub>3</sub>) δ 207.6, 173.4, 171.0, 170.8, 136.4, 135.7, 129.3, 129.2, 128.7, 128.6, 127.2, 127.0, 59.3, 54.1, 53.1, 52.7, 52.5, 37.9, 37.1, 36.5, 31.8, 31.3, 27.3, 25.3, 22.4, 22.3, 16.5, 13.9, 13.9. HRESIMS *m/z* [M+Na]<sup>+</sup> 586.3265 (calcd for C<sub>33</sub>H<sub>45</sub>N<sub>3</sub>O<sub>5</sub>Na, 586.3257).

Analog **8**: (S)-2-((S)-2-hexanamido-3-(pyridin-4-yl)propanamido)-N-((S)-1-((R)-2-methyloxiran-2-yl)-1-oxo-3-phenylpropan-2-yl)hexanamide.

**Smile:**

O=C(N[C@@H](CC1=CC=NC=C1)C(N[C@@H](CCCC)C(N[C@@H](CC2=CC=CC=C2)C([C@]3(CO3)C)=O)=O)CCCC

Yield 48%; [α]<sub>D</sub><sup>28</sup> -24 (c 1.0, CHCl<sub>3</sub>); <sup>1</sup>H NMR (500 MHz, CDCl<sub>3</sub>) δ 8.42 – 8.36 (d, *J* = 4.5 Hz, 2H), 7.25 (m, 3H), 7.13 – 7.06 (m, 2H), 6.98 (d, *J* = 4.5 Hz, 2H), 6.46 (d, *J* = 7.7 Hz, 1H), 6.24 (d, *J* = 7.4 Hz, 1H), 5.92 (d, *J* = 7.9 Hz, 1H), 4.72 (td, *J* = 7.6, 4.2 Hz, 1H), 4.60 (q, *J* = 7.3 Hz, 1H), 4.15 (td, *J* = 7.7, 5.7 Hz, 1H), 3.24 (d, *J* = 4.9 Hz, 1H), 3.09 (dd, *J* = 14.1, 4.9 Hz, 1H), 2.95 (dd, *J* = 14.1, 6.7 Hz, 1H), 2.89 (d, *J* = 7.3 Hz, 1H), 2.87 (d, *J* =

4.9 Hz, 1H), 2.71 (dd,  $J = 14.1, 8.1$  Hz, 1H), 2.07 (t,  $J = 7.6$  Hz, 2H), 1.61-1.57 (m, 2H), 1.50 – 1.45 (m, 2H), 1.44 (s, 3H), 1.28 – 1.06 (m, 8H), 0.80 (t,  $J = 7.1$  Hz, 3H), 0.78 (t,  $J = 7.4$  Hz, 3H).  $^{13}\text{C}$  NMR (126 MHz,  $\text{CDCl}_3$ )  $\delta$  207.3, 173.4, 170.8, 170.2, 149.9, 145.4, 135.5, 129.3, 128.7, 127.2, 124.4, 59.3, 53.2, 53.0, 52.8, 52.6, 37.0, 36.9, 36.4, 31.8, 31.2, 27.2, 25.2, 22.3, 22.3, 16.6, 13.9, 13.8. HRESIMS  $m/z$   $[\text{M}+\text{Na}]^+$  587.3211 (calcd for  $\text{C}_{32}\text{H}_{44}\text{N}_4\text{O}_5\text{Na}$ , 587.3209).

Analog **9**: (S)-2-((S)-3-(4-aminophenyl)-2-hexanamidopropanamido)-N-((S)-1-((R)-2-methyloxiran-2-yl)-1-oxo-3-phenylpropan-2-yl)hexanamide.

**Smile:**

O=C(N[C@@H](CC1=CC=C(N)C=C1)C(N[C@@H](CCCC)C(N[C@@H](CC2=CC=CC=C2)C([C@]3(CO3)C)=O)=O)CCCC

Yield 31%;  $[\alpha]_D^{28} +22$  (c 0.9,  $\text{CHCl}_3$ );  $^1\text{H}$  NMR (500 MHz,  $\text{CDCl}_3$ )  $\delta$  7.28 – 7.21 (m, 3H), 7.11 – 7.08 (m, 2H), 6.85 (d,  $J = 8.1$  Hz, 2H), 6.50 (d,  $J = 8.1$  Hz, 2H), 6.30 (d,  $J = 7.5$  Hz, 1H), 6.10 (d,  $J = 7.5$  Hz, 1H), 5.87 (d,  $J = 7.3$  Hz, 1H), 4.70 (td,  $J = 8.0, 4.9$  Hz, 1H), 4.43 (q,  $J = 7.0$  Hz, 1H), 4.20 – 4.08 (m, 1H), 3.27 (d,  $J = 5.0$  Hz, 1H), 3.06 (dd,  $J = 14.0, 4.9$  Hz, 1H), 2.92 – 2.83 (m, 2H), 2.72 (ddd,  $J = 25.3, 14.0, 7.8$  Hz, 2H), 2.08 (t,  $J = 7.6$  Hz, 2H), 1.62 – 1.47 (m, 3H), 1.43 (s, 3H), 1.40 – 1.29 (m, 1H), 1.19 (ddt,  $J = 19.4, 12.9, 5.8$  Hz, 6H), 1.03 (q,  $J = 7.5$  Hz, 2H), 0.84 – 0.79 (m, 3H), 0.76 (t,  $J = 7.3$  Hz, 3H).  $^{13}\text{C}$  NMR (125 MHz,  $\text{CDCl}_3$ )  $\delta$  207.5, 173.4, 171.0, 170.9, 136.3, 135.7, 129.3, 129.2, 128.7, 128.6, 127.2, 127.3, 115.6, 59.3, 54.1, 53.1, 52.7, 52.5, 37.9, 37.1, 36.5, 31.8, 31.3, 27.3, 25.3, 22.4, 22.3, 16.6, 13.9, 13.9. HRESIMS  $m/z$   $[\text{M}+\text{Na}]^+$  601.3375 (calcd for  $\text{C}_{33}\text{H}_{46}\text{N}_4\text{O}_5\text{Na}$ , 601.3366).

Analog **10**: tert-butyl (4-((S)-2-hexanamido-3-(((S)-1-(((S)-1-((R)-2-methyloxiran-2-yl)-1-oxo-3-phenylpropan-2-yl)amino)-1-oxohexan-2-yl)amino)-3-oxopropyl)phenyl)carbamate.

**Smile:**

O=C(N[C@@H](CC1=CC=C(NC(OC(C)(C)C)=O)C=C1)C(N[C@@H](CCCC)C(N[C@@H](CC2=CC=CC=C2)C([C@]3(CO3)C)=O)=O)CCCC

Yield 72%;  $[\alpha]_D^{28} +2$  (c 0.9, CHCl<sub>3</sub>); <sup>1</sup>H NMR (500 MHz, CDCl<sub>3</sub>) δ 7.29 (m, 3H), 7.23 (t, *J* = 7.2 Hz, 2H), 7.18 (d, *J* = 7.5 Hz, 2H), 7.03 (d, *J* = 8.0 Hz, 2H), 6.68 (d, *J* = 7.3 Hz, 1H), 6.54 (d, *J* = 7.9 Hz, 1H), 6.51 (s, 1H), 6.21 (d, *J* = 7.5 Hz, 1H), 4.79 (td, *J* = 7.8, 4.9 Hz, 1H), 4.61 (q, *J* = 7.2 Hz, 1H), 4.30 (q, *J* = 7.1 Hz, 1H), 3.71 (d, *J* = 8.7 Hz, 1H), 3.33 (d, *J* = 5.0 Hz, 1H), 3.11 (dd, *J* = 13.9, 4.9 Hz, 1H), 2.99 – 2.85 (m, 3H), 2.77 (dd, *J* = 14.0, 8.3 Hz, 1H), 2.15 (t, *J* = 7.6 Hz, 2H), 1.83 (m, 2H), 1.66 (dt, *J* = 12.0, 5.5 Hz, 1H), 1.55 (td, *J* = 7.8, 5.4 Hz, 2H), 1.51 (s, 9H), 1.49 (s, 3H), 1.45 (m, 1H), 1.24 (dtd, *J* = 18.8, 14.4, 7.1 Hz, 6H), 1.11 (q, *J* = 7.8 Hz, 2H), 0.86 (t, *J* = 7.2 Hz, 3H), 0.82 (t, *J* = 7.3 Hz, 3H). <sup>13</sup>C NMR (126 MHz, CDCl<sub>3</sub>) δ 207.6, 173.4, 171.0, 171.0, 152.6, 137.3, 135.8, 130.6, 129.7, 129.3, 128.6, 127.1, 118.5, 80.5, 59.3, 54.1, 53.1, 52.7, 52.5, 37.2, 37.0, 36.4, 31.8, 31.3, 28.3, 27.2, 25.3, 22.3, 22.3, 16.5, 13.9, 13.8. HRESIMS *m/z* [M+Na]<sup>+</sup> 701.3896 (calcd for C<sub>38</sub>H<sub>54</sub>N<sub>4</sub>O<sub>7</sub>Na, 701.3890).

Analog 11: (S)-2-((S)-2-hexanamido-3-(1H-indol-3-yl)propanamido)-N-((S)-1-((R)-2-methyloxiran-2-yl)-1-oxo-3-phenylpropan-2-yl)hexanamide.

**Smile:**

O=C(N[C@@H](CC1=CNC2=C1C=CC=C2)C(N[C@@H](CCCC)C(N[C@@H](CC3=CC=CC=C3)C([C@]4(CO4)C)=O)=O)CCCC

Yield 69%  $[\alpha]_D^{28} +54$  (c 0.9, CHCl<sub>3</sub>); <sup>1</sup>H NMR (500 MHz, CDCl<sub>3</sub>) δ 8.09 (d, *J* = 2.3 Hz, 1H), 7.72 (d, *J* = 7.9 Hz, 1H), 7.37 – 7.29 (m, 4H), 7.19 (dt, *J* = 8.3, 1.3 Hz, 1H), 7.17 – 7.08 (m, 4H), 6.88 (d, *J* = 2.5 Hz, 1H), 6.43 (d, *J* = 7.6 Hz, 1H), 6.31 (d, *J* = 7.3 Hz, 1H), 6.12 (d, *J* = 7.8 Hz, 1H), 4.74 (m, 2H), 4.23 (td, *J* = 7.7, 5.6 Hz, 1H), 3.33 (t, *J* = 5.5 Hz, 1H), 3.27 (dd, *J* = 14.5, 5.5 Hz, 1H), 3.19 – 3.01 (m, 2H), 2.95 – 2.89 (m, 1H), 2.72 – 2.63 (m, 1H), 2.23 – 2.13 (m, 2H), 1.76 (m, 2H), 1.65 – 1.57 (m, 2H), 1.51 (s, 3H), 1.37 – 1.22 (m, 4H), 1.19 – 1.12 (m, 2H), 1.05 – 0.95 (m, 2H), 0.87 (td, *J* = 7.1, 1.4 Hz, 3H), 0.78 (td, *J* = 7.4, 1.4 Hz, 3H). <sup>13</sup>C NMR (126 MHz, CDCl<sub>3</sub>) δ 207.7, 173.4, 171.4, 171.0, 136.1, 135.9, 135.5, 129.3, 128.6, 127.1, 123.2, 122.4, 119.8, 118.8, 111.3, 110.3, 59.3, 53.7, 53.1, 52.7, 52.6, 37.1, 36.9, 36.5, 31.6, 31.3, 28.1, 27.1, 25.2, 22.3, 22.2, 16.5, 13.9, 13.8. HRESIMS *m/z* [M+H]<sup>+</sup> 603.3549 (calcd for C<sub>35</sub>H<sub>46</sub>N<sub>4</sub>O<sub>5</sub>H, 603.3546).



Analog **12**: N-((R)-3-(4-aminophenyl)-1-(((S)-3-(4-aminophenyl)-1-(((S)-4-methyl-1-((R)-2-methyloxiran-2-yl)-1-oxopentan-2-yl)amino)-1-oxopropan-2-yl)amino)-1-oxopropan-2-yl)hexanamide .

**Smile:**

O=C(N[C@@H](CC1=CC=C(N)C=C1)C(N[C@@H](CC2=CC=C(N)C=C2)C(N[C@@H](CC(C)C)C([C@]3(CO3)C)=O)=O)=O)CCCCC

Yield 29%;  $[\alpha]_D^{28}$  -16 (c 1.0, CHCl<sub>3</sub>); <sup>1</sup>H NMR (500 MHz, CDCl<sub>3</sub>) δ 6.89 (d, *J* = 8.3 Hz, 2H), 6.78 (d, *J* = 8.4 Hz, 2H), 6.54 (d, *J* = 8.4 Hz, 2H), 6.48 (d, *J* = 8.4 Hz, 2H), 6.16 (d, *J* = 7.8 Hz, 2H), 5.77 (d, *J* = 6.8 Hz, 1H), 4.52 – 4.33 (m, 3H), 3.23 (dd, *J* = 5.0, 0.7 Hz, 1H), 2.91 (m, 2H), 2.87 – 2.79 (m, 2H), 2.70 (dd, *J* = 14.0, 6.8 Hz, 1H), 2.00 (t, *J* = 7.7 Hz, 2H), 1.47 – 1.37 (m, 3H), 1.44 (s, 3H), 1.26 – 1.11 (m, 6H), 0.87 – 0.85 (m, 3H), 0.84 – 0.82 (m, 2H), 0.80 (d, *J* = 7.3 Hz, 3H). HRESIMS *m/z* [M+Na]<sup>+</sup> 616.3470 (calcd for C<sub>33</sub>H<sub>47</sub>N<sub>5</sub>O<sub>5</sub>Na, 616.3475).

Analog **13**: N-((R)-3-(4-aminophenyl)-1-(((S)-3-(4-aminophenyl)-1-(((S)-1-((R)-2-methyloxiran-2-yl)-1-oxo-3-phenylpropan-2-yl)amino)-1-oxopropan-2-yl)amino)-1-oxopropan-2-yl)hexanamide.

**Smile:**

O=C(N[C@@H](CC1=CC=C(N)C=C1)C(N[C@@H](CC2=CC=C(N)C=C2)C(N[C@@H](CC3=CC=CC=C3)C([C@]4(CO4)C)=O)=O)=O)CCCCC

Yield 19%;  $[\alpha]_D^{28}$  +23 (c 1.2, CHCl<sub>3</sub>); <sup>1</sup>H NMR (500 MHz, CDCl<sub>3</sub>) δ 7.19 – 7.14 (m, 4H), 7.01 – 6.98 (m, 1H), 6.83 (d, *J* = 8.2 Hz, 1H), 6.78 – 6.75 (m, 1H), 6.52 – 6.45 (m, 2H), 6.22 (dd, *J* = 10.4, 7.4 Hz, 1H), 5.88 (d, *J* = 7.1 Hz, 1H), 4.64 (td, *J* = 7.8, 5.0 Hz, 1H), 4.40 (q, *J* = 6.9 Hz, 1H), 4.31 (q, *J* = 7.0 Hz, 1H), 3.23 (d, *J* = 4.9 Hz, 1H), 3.05 (m, 1H), 2.91 – 2.80 (m, 2H), 2.76 (ddd, *J* = 14.1, 10.3, 6.7 Hz, 1H), 2.67 (dd, *J* = 14.1, 7.0 Hz, 1H), 2.59 (dd, *J* = 14.0, 8.5 Hz, 1H), 2.02 (t, *J* = 7.6 Hz, 2H), 1.57 – 1.28 (m, 7H), 1.28 – 1.10 (m, 4H), 0.81 (t, *J* = 7.1 Hz, 6H). <sup>13</sup>C NMR (126 MHz, CD<sub>3</sub>OD) δ 207.1, 174.8, 172.1, 171.6, 161.8, 136.6, 129.6, 129.4, 128.9, 128.0, 115.4, 58.6, 54.7, 52.6, 51.5, 42.3, 36.8, 36.1, 35.4, 30.9, 25.1, 22.0, 22.0, 17.2, 15.8, 15.2, 12.9, 11.7. HRESIMS *m/z* [M+Na]<sup>+</sup> 650.3317 (calcd for C<sub>36</sub>H<sub>45</sub>N<sub>5</sub>O<sub>5</sub>Na, 650.3318).

Analog **14**: tert-butyl (4-((R)-3-(((S)-3-(4-((tert-butoxycarbonyl)amino)phenyl)-1-(((S)-4-methyl-1-((R)-2-methyloxiran-2-yl)-1-oxopentan-2-yl)amino)-1-oxopropan-2-yl)amino)-2-hexanamido-3-oxopropyl)phenyl)carbamate.

**Smile:**

O=C(N[C@@H](CC1=CC=C(NC(OC(C)(C)C)=O)C=C1)C(N[C@@H](CC2=CC=C(NC(OC(C)(C)C)=O)C=C2)C(N[C@@H](CC(C)C)C([C@]3(CO3)C)=O)=O)=O)CCCCC

Yield 42%;  $[\alpha]_D^{28} +35$  (c 0.9, CHCl<sub>3</sub>); <sup>1</sup>H NMR (500 MHz, CDCl<sub>3</sub>) δ 7.27 (d, *J* = 8.1 Hz, 2H), 7.22 (d, *J* = 8.1 Hz, 2H), 7.04 (d, *J* = 8.2 Hz, 2H), 6.96 (d, *J* = 8.2 Hz, 2H), 6.71 (s, 1H), 6.67 (s, 1H), 6.57 – 6.44 (m, 2H), 6.02 (dd, *J* = 7.5, 3.2 Hz, 1H), 4.63 – 4.57 (m, 2H), 4.53 (td, *J* = 8.0, 4.0 Hz, 1H), 3.26 (d, *J* = 5.0 Hz, 1H), 2.96 (dd, *J* = 13.6, 6.6 Hz, 2H), 2.95-2.93 (m, 2H) 2.89 (d, *J* = 4.8 Hz, 1H), 2.09 (t, *J* = 7.7 Hz, 2H), 1.87 (m, 2H), 1.58 – 1.48 (m, 18H), 1.26 (td, *J* = 8.0, 7.5, 2.4 Hz, 4H), 1.22 – 1.16 (m, 2H), 0.92 (d, *J* = 6.1 Hz, 3H), 0.91 – 0.87 (m, 3H), 0.86 (d, *J* = 7.3 Hz, 3H). <sup>13</sup>C NMR (126 MHz, CDCl<sub>3</sub>) δ 208.1, 173.7, 170.9, 170.4, 152.8, 137.4, 137.2, 130.6, 130.5, 129.7, 129.6, 118.9, 118.8, 80.5, 59.0, 54.2, 54.1, 52.4, 50.1, 39.8, 37.0, 36.7, 36.3, 31.3, 28.3, 28.3, 25.1, 25.0, 23.3, 22.3, 21.2, 21.1, 16.6, 13.9. HRESIMS *m/z* [M+Na]<sup>+</sup> 816.4526 (calcd for C<sub>43</sub>H<sub>63</sub>N<sub>5</sub>O<sub>9</sub>Na, 816.4523).

Analog **15**: tert-butyl (4-((R)-3-(((S)-3-(4-((tert-butoxycarbonyl)amino)phenyl)-1-(((S)-1-((R)-2-methyloxiran-2-yl)-1-oxo-3-phenylpropan-2-yl)amino)-1-oxopropan-2-yl)amino)-2-hexanamido-3-oxopropyl)phenyl)carbamate.

**Smile:**

O=C(N[C@@H](CC1=CC=C(NC(OC(C)(C)C)=O)C=C1)C(N[C@@H](CC2=CC=C(NC(OC(C)(C)C)=O)C=C2)C(N[C@@H](CC3=CC=CC=C3)C([C@]4(CO4)C)=O)=O)=O)CCCCC

Yield 63%;  $[\alpha]_D^{28} -2$  (c 1.4, CHCl<sub>3</sub>); <sup>1</sup>H NMR (500 MHz, CDCl<sub>3</sub>) δ 7.27 – 7.22 (m, 3H), 7.20 (d, *J* = 8.4 Hz, 2H), 7.11 – 7.05 (m, 2H), 7.03 – 6.97 (m, 2H), 6.92 (dd, *J* = 8.9, 2.2 Hz, 2H), 6.64 (d, *J* = 13.8 Hz, 2H), 6.45 – 6.38 (m, 2H), 5.98 (d, *J* = 7.5 Hz, 1H), 4.73 (td, *J* = 8.0, 5.0 Hz, 1H), 4.56 (q, *J* = 7.0 Hz, 1H), 4.48 (q, *J* = 7.2 Hz, 1H), 3.27 (d, *J* = 4.9 Hz, 1H), 3.06 (dd, *J* = 14.0, 5.0 Hz, 1H), 2.99 (dd, *J* = 14.1, 6.6 Hz, 1H), 2.92 – 2.83 (m, 4H), 2.69 (dd, *J* = 13.9, 8.3 Hz, 1H), 2.10 (td, *J* = 7.6, 1.2 Hz, 2H), 1.54-1.46 (m, 2H), 1.52 (s, 18H), 1.46 (s, 3H), 1.30 – 1.25 (m, 2H), 1.24 – 1.16 (m, 2H), 0.87 (t, *J* = 7.2 Hz, 3H). <sup>13</sup>C NMR (126 MHz, CDCl<sub>3</sub>) δ 207.1,

173.5, 170.8, 170.1, 152.7, 137.3, 137.2, 135.7, 130.6, 129.7, 129.6, 129.3, 128.5, 127.0, 118.8, 80.5, 59.2, 54.1, 54.0, 52.6, 52.5, 37.1, 36.9, 36.8, 36.4, 31.3, 28.3, 28.3, 25.2, 22.3, 16.4, 13.9. HRESIMS  $m/z$   $[M+Na]^+$  850.4368 (calcd for  $C_{46}H_{61}N_5O_9Na$ , 850.4367).

Analog **16**: N-((S)-1-(((S)-3-(1H-indol-3-yl)-1-(((S)-4-methyl-1-((R)-2-methyloxiran-2-yl)-1-oxopentan-2-yl)amino)-1-oxopropan-2-yl)amino)-3-(1H-indol-3-yl)-1-oxopropan-2-yl)hexanamide.

**Smile:**

O=C(N[C@@H](CC1=CNC2=C1C=CC=C2)C(N[C@@H](CC3=CNC4=C3C=CC=C4)C(N[C@@H](CC(C)C)C([C@]5(CO5)C=O)=O)=O)CCCCC

Yield 62%;  $[\alpha]_D^{28}$  +63 (c 0.9,  $CHCl_3$ );  $^1H$  NMR (500 MHz,  $CDCl_3$ )  $\delta$  8.40 (s, 1H), 8.14 (s, 1H), 7.69 (d,  $J$  = 7.9 Hz, 1H), 7.45 (d,  $J$  = 8.1 Hz, 1H), 7.33 – 7.25 (m, 3H), 7.21 (t,  $J$  = 7.6 Hz, 1H), 7.11 – 7.03 (m, 2H), 6.87 (d,  $J$  = 2.4 Hz, 1H), 6.69 (dd,  $J$  = 8.2, 4.4 Hz, 1H), 6.54 (t,  $J$  = 7.6 Hz, 1H), 6.43 (d,  $J$  = 8.0 Hz, 1H), 6.26 (d,  $J$  = 8.1 Hz, 1H), 5.83 (d,  $J$  = 6.6 Hz, 1H), 4.69 (ddd,  $J$  = 8.4, 6.2, 4.2 Hz, 1H), 4.61 (t,  $J$  = 5.9 Hz, 1H), 4.47 (ddd,  $J$  = 11.1, 8.2, 3.2 Hz, 1H), 3.54 – 3.48 (m, 1H), 3.29 (dd,  $J$  = 13.3, 4.5 Hz, 2H), 3.12 (dd,  $J$  = 14.8, 6.6 Hz, 1H), 2.85 (d,  $J$  = 4.9 Hz, 1H), 2.77 (dd,  $J$  = 14.6, 6.2 Hz, 1H), 1.73 (m, 2H), 1.59 (td,  $J$  = 12.2, 9.1, 4.3 Hz, 1H), 1.48 (s, 3H), 1.45 – 1.33 (m, 1H), 1.32 – 1.14 (m, 4H), 1.12 – 1.00 (m, 3H), 0.89 – 0.81 (m, 6H), 0.77 (d,  $J$  = 6.3 Hz, 3H).  $^{13}C$  NMR (126 MHz,  $CDCl_3$ )  $\delta$  207.9, 173.6, 170.8, 170.7, 136.3, 135.9, 127.5, 127.2, 123.7, 123.3, 122.7, 122.1, 120.2, 119.4, 118.6, 118.1, 111.6, 111.3, 110.1, 109.3, 59.1, 54.2, 53.6, 52.3, 50.1, 39.3, 38.6, 35.7, 31.2, 26.9, 26.6, 24.7, 23.2, 22.3, 21.1, 16.7, 13.9. HRESIMS  $m/z$   $[M+Na]^+$  664.3471 (calcd for  $C_{37}H_{47}N_5O_5Na$ , 664.3475).

Analog **17**: N-((S)-1-(((S)-3-(1H-indol-3-yl)-1-(((S)-1-((R)-2-methyloxiran-2-yl)-1-oxo-3-phenylpropan-2-yl)amino)-1-oxopropan-2-yl)amino)-3-(1H-indol-3-yl)-1-oxopropan-2-yl)hexanamide.

**Smile:**

O=C(N[C@@H](CC1=CNC2=C1C=CC=C2)C(N[C@@H](CC3=CNC4=C3C=CC=C4)C(N[C@@H](CC5=CC=CC=C5)C([C@]6(CO6)C=O)=O)=O)CCCCC

Yield 46%;  $[\alpha]_D^{28} +35$  (c 0.9, CHCl<sub>3</sub>); <sup>1</sup>H NMR (500 MHz, CDCl<sub>3</sub>) δ 8.29 (s, 1H), 7.85 – 7.81 (m, 1H), 7.67 (d, *J* = 7.9 Hz, 1H), 7.43 (d, *J* = 8.1 Hz, 1H), 7.30 – 7.19 (m, 5H), 7.16 (t, *J* = 7.5 Hz, 1H), 7.08 (t, *J* = 7.6 Hz, 1H), 6.99 – 6.93 (m, 3H), 6.79 (d, *J* = 7.4 Hz, 1H), 6.64 (t, *J* = 7.6 Hz, 1H), 6.50 (d, *J* = 2.7 Hz, 1H), 6.44 (d, *J* = 7.7 Hz, 1H), 6.11 (d, *J* = 7.8 Hz, 1H), 5.90 (d, *J* = 6.7 Hz, 1H), 4.71 (td, *J* = 8.4, 4.4 Hz, 1H), 4.60 (dtd, *J* = 14.3, 6.9, 4.5 Hz, 2H), 3.44 (dd, *J* = 14.8, 4.6 Hz, 1H), 3.29 (d, *J* = 4.9 Hz, 1H), 3.15 (dd, *J* = 14.5, 4.4 Hz, 1H), 3.06 (dd, *J* = 14.7, 7.0 Hz, 1H), 2.96 (dd, *J* = 14.0, 4.4 Hz, 1H), 2.86 (d, *J* = 4.9 Hz, 1H), 2.71 (dd, *J* = 14.6, 6.6 Hz, 1H), 2.54 (dd, *J* = 14.0, 8.9 Hz, 1H), 1.80 (m, 2H), 1.66 – 1.52 (m, 2H), 1.46 (s, 3H), 1.25 (dt, *J* = 15.3, 7.4 Hz, 2H), 1.19 – 1.07 (m, 2H), 0.88 (t, *J* = 7.3 Hz, 3H). <sup>13</sup>C NMR (126 MHz, CDCl<sub>3</sub>) δ 207.1, 173.6, 170.9, 170.7, 136.5, 136.3, 135.7, 129.3, 128.3, 127.4, 127.1, 126.6, 123.7, 123.3, 122.6, 122.0, 120.0, 119.4, 118.7, 118.1, 111.5, 111.2, 110.1, 108.9, 59.2, 54.1, 53.7, 52.7, 52.4, 36.5, 35.8, 31.2, 27.3, 26.6, 24.9, 22.3, 16.5, 14.0. HRESIMS *m/z* [M+Na]<sup>+</sup> 698.3322 (calcd for C<sub>40</sub>H<sub>45</sub>N<sub>5</sub>O<sub>5</sub>Na, 698.3318).

Analog **18**: (S)-2-((R)-2-hexanamido-3-methylbutanamido)-N-((S)-4-methyl-1-((R)-2-methyloxiran-2-yl)-1-oxopentan-2-yl)hexanamide.

**Smile:**

O=C(CCCCC)N[C@H](C(C)C)C(N[C@@H](CCCC)C(N[C@@H](CC(C)C)C([C@]1(C)OC1)=O)=O

Yield 43%;  $[\alpha]_D^{28} +54$  (c 0.9, CHCl<sub>3</sub>); <sup>1</sup>H NMR (500 MHz, Chloroform-*d*) δ 6.84 (dd, *J* = 7.9, 2.7 Hz, 1H), 6.78 (dd, *J* = 8.3, 2.6 Hz, 1H), 6.39 (dd, *J* = 8.2, 2.6 Hz, 1H), 4.54 (ddd, *J* = 10.8, 7.6, 3.2 Hz, 1H), 4.48 – 4.39 (m, 1H), 4.22 (td, *J* = 8.0, 2.6 Hz, 1H), 3.32 (dd, *J* = 5.3, 2.5 Hz, 1H), 2.87 (dd, *J* = 5.2, 2.6 Hz, 1H), 2.23 (tt, *J* = 7.8, 2.6 Hz, 2H), 2.08 (qd, *J* = 7.0, 2.6 Hz, 1H), 2.05 – 2.00 (m, 2H), 1.87 – 1.77 (m, 1H), 1.72 – 1.55 (m, 4H), 1.53 – 1.46 (m, 3H), 1.37 – 1.19 (m, 6H), 0.93 (ddt, *J* = 9.8, 6.3, 3.1 Hz, 12H), 0.87 (tq, *J* = 6.3, 3.3, 2.7 Hz, 6H). <sup>13</sup>C NMR (150 MHz, CDCl<sub>3</sub>) δ 209.2, 173.6, 171.5, 171.4, 59.0, 58.8, 52.8, 52.4, 49.9, 39.7, 36.4, 32.1, 31.4, 31.1, 27.5, 25.4, 25.1, 23.3, 22.3, 22.3, 21.1, 19.1, 18.5, 16.6, 13.9, 13.8. HRESIMS *m/z* [M+Na]<sup>+</sup> 504.3404 (calcd for C<sub>26</sub>H<sub>47</sub>N<sub>3</sub>O<sub>5</sub>Na, 504.3408).

Analog **19**: (S)-2-((R)-2-hexanamido-3-(1H-indol-3-yl)propanamido)-N-((S)-4-methyl-1-((R)-2-methyloxiran-2-yl)-1-oxopentan-2-yl)hexanamide.

**Smile:**

O=C(N[C@H](CC1=CNC2=C1C=CC=C2)C(N[C@@H](CCCC)C(N[C@@H](CC(C)C)C([C@]3(CO3)C)=O)=O)=O)CCCCC

Yield 42%;  $[\alpha]_D^{28} +7$  (*c* 0.2, CHCl<sub>3</sub>); <sup>1</sup>H NMR (500 MHz, CDCl<sub>3</sub>) δ 8.15 (s, 1H), 7.67 (d, *J* = 7.9 Hz, 1H), 7.37 (d, *J* = 8.1 Hz, 1H), 7.21 (ddd, *J* = 8.2, 7.1, 1.2 Hz, 1H), 7.15 (ddd, *J* = 8.0, 7.1, 1.1 Hz, 1H), 7.07 (d, *J* = 2.4 Hz, 1H), 6.56 (d, *J* = 7.9 Hz, 1H), 6.24 (d, *J* = 7.1 Hz, 1H), 6.09 (d, *J* = 8.0 Hz, 1H), 4.67 (ddd, *J* = 8.7, 7.1, 6.0 Hz, 1H), 4.51 (ddd, *J* = 10.8, 7.9, 3.2 Hz, 1H), 4.18 (td, *J* = 8.0, 5.6 Hz, 1H), 3.35 – 3.30 (m, 1H), 3.29 – 3.24 (m, 1H), 3.18 (dd, *J* = 14.3, 8.7 Hz, 1H), 2.87 (d, *J* = 5.0 Hz, 1H), 2.26 – 2.10 (m, 2H), 1.66-1.63 (m, 1H), 1.62 – 1.54 (m, 2H), 1.53 – 1.46 (m, 4H), 1.35 – 1.21 (m, 6H), 1.15 (qd, *J* = 7.5, 1.9 Hz, 2H), 0.92 (t, *J* = 6.8 Hz, 6H), 0.87 (t, *J* = 7.1 Hz, 3H), 0.80 (t, *J* = 7.3 Hz, 3H). <sup>13</sup>C NMR (126 MHz, CDCl<sub>3</sub>) δ 208.3, 173.8, 171.4, 171.4, 136.1, 127.2, 122.9, 122.4, 119.9, 118.6, 111.3, 110.4, 59.1, 54.4, 53.3, 52.4, 50.2, 39.6, 36.4, 31.3, 31.1, 27.9, 27.1, 25.1, 25.1, 23.3, 22.3, 22.2, 21.2, 16.7, 13.9, 13.8. HRESIMS *m/z* [M+Na]<sup>+</sup> 591.3519 (calcd for C<sub>32</sub>H<sub>48</sub>N<sub>4</sub>O<sub>5</sub>Na, 591.3522).

Analog **20**: (S)-2-((R)-2-hexanamido-3-(pyridin-4-yl)propanamido)-N-((S)-4-methyl-1-((R)-2-methyloxiran-2-yl)-1-oxopentan-2-yl)hexanamide.

**Smile:**

O=C(N[C@H](CC1=CC=NC=C1)C(N[C@@H](CCCC)C(N[C@@H](CC(C)C)C([C@]2(CO2)C)=O)=O)=O)CCCCC

Yield 15%;  $[\alpha]_D^{28} +15$  (*c* 0.08, CHCl<sub>3</sub>); <sup>1</sup>H NMR (500 MHz, CDCl<sub>3</sub>) δ 8.46 (d, *J* = 4.2 Hz, 2H), 7.08 (d, *J* = 4.2 Hz, 2H), 6.75 (d, *J* = 7.5 Hz, 1H), 6.23 (d, *J* = 8.2 Hz, 1H), 5.95 (d, *J* = 7.5 Hz, 1H), 4.57 (q, *J* = 7.3 Hz, 1H), 4.48 (t, *J* = 9.8 Hz, 1H), 4.25-4.15 (m, 1H), 3.21 (d, *J* = 5.2 Hz, 1H), 3.06 (dd, *J* = 13.8, 8.0 Hz, 1H), 2.95 (dd, *J* = 13.8, 6.7 Hz, 1H), 2.82 (d, *J* = 5.0 Hz, 1H), 2.16 (t, *J* = 7.5 Hz, 2H), 1.80 (m, 1H), 1.65 – 1.50 (m, 4H), 1.52 (s, 1H), 1.42 – 1.20 (m, 8H), 0.95 (t, *J* = 6.0, 3H), 0.93 (t, *J* = 6.2, 3H), 0.86 (m, 6H). HRESIMS *m/z* [M+H]<sup>+</sup> 531.3549 (calcd for C<sub>29</sub>H<sub>47</sub>N<sub>4</sub>O<sub>5</sub>, 531.3546).
